# Supplementary material for: Insights into Heterologous Biosynthesis of Arteannuin B and Artemisinin in Physcomitrella patens
Source: PubMed Central journal article supplement (PMC6864739; doi:10.3390/molecules24213822), 2019-10-23
Supplement: molecules-24-03822-s001.pdf [file molecules-24-03822-s001.pdf]

## Supplementary data for:

### Insights into heterologous biosynthesis of arteannuin B and artemisinin in *Physcomitrella patens*

Nur Kusaira Khairul Ikram<sup>1,4</sup>, Arman Beyraghdar Kashkooli<sup>3,5</sup>, Anantha Peramuna<sup>2</sup>, Alexander R. van der Krol<sup>3</sup>, Harro Bouwmeester<sup>3,6</sup> and Henrik Toft Simonsen<sup>2\*</sup>

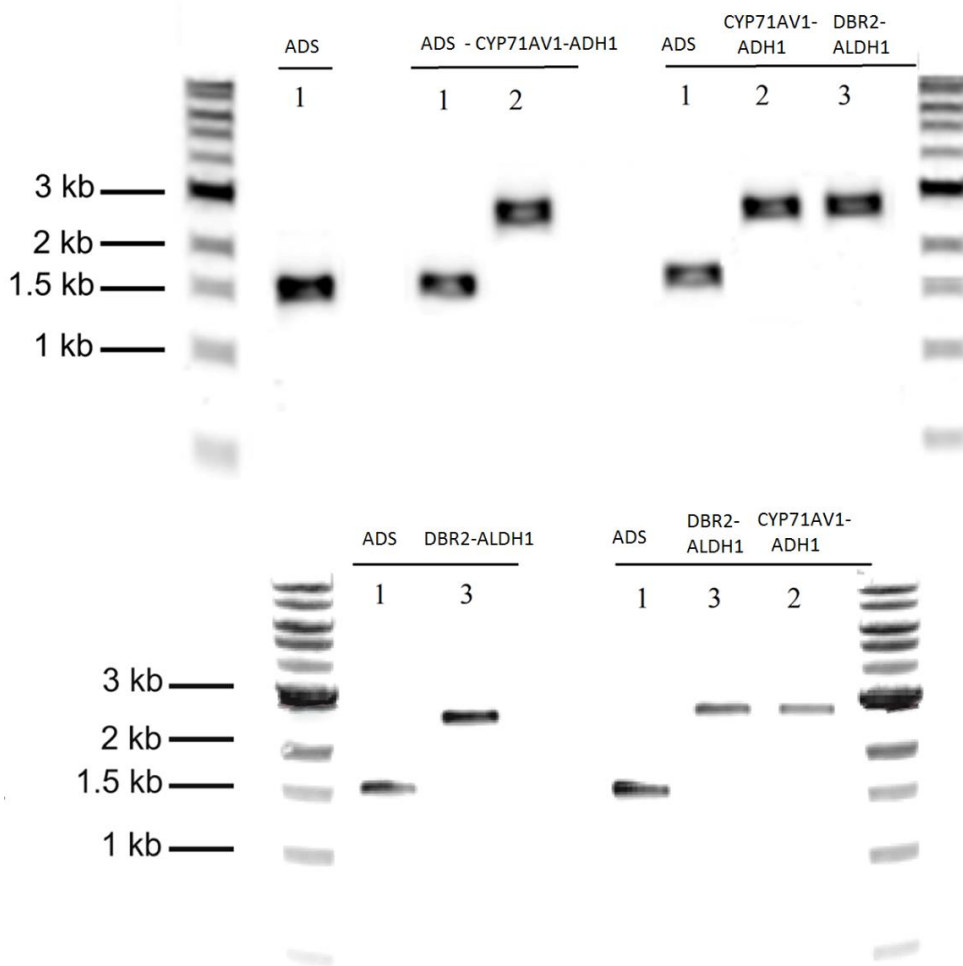

**Supplemental Figure S1.** Genotyping of the moss lines via PCR using gene-specific primers of 1. *ADS*, 1641bp 2. *CYP71AV1-ADH1*, 2709bp and 3. *DBR2-ALDH1* (2748bp). Each transgenic line is shown for constructs *ADS*; *ADS-CYP71AV1-ADH1*; *ADS-CYP71AV1-ADH1-DBR2-ALDH1*; *ADS-DBR2-ALDH1* and *ADS DBR21-ALDH-CYP71AV1-ADH1*. The PCR products were sequence-verified.

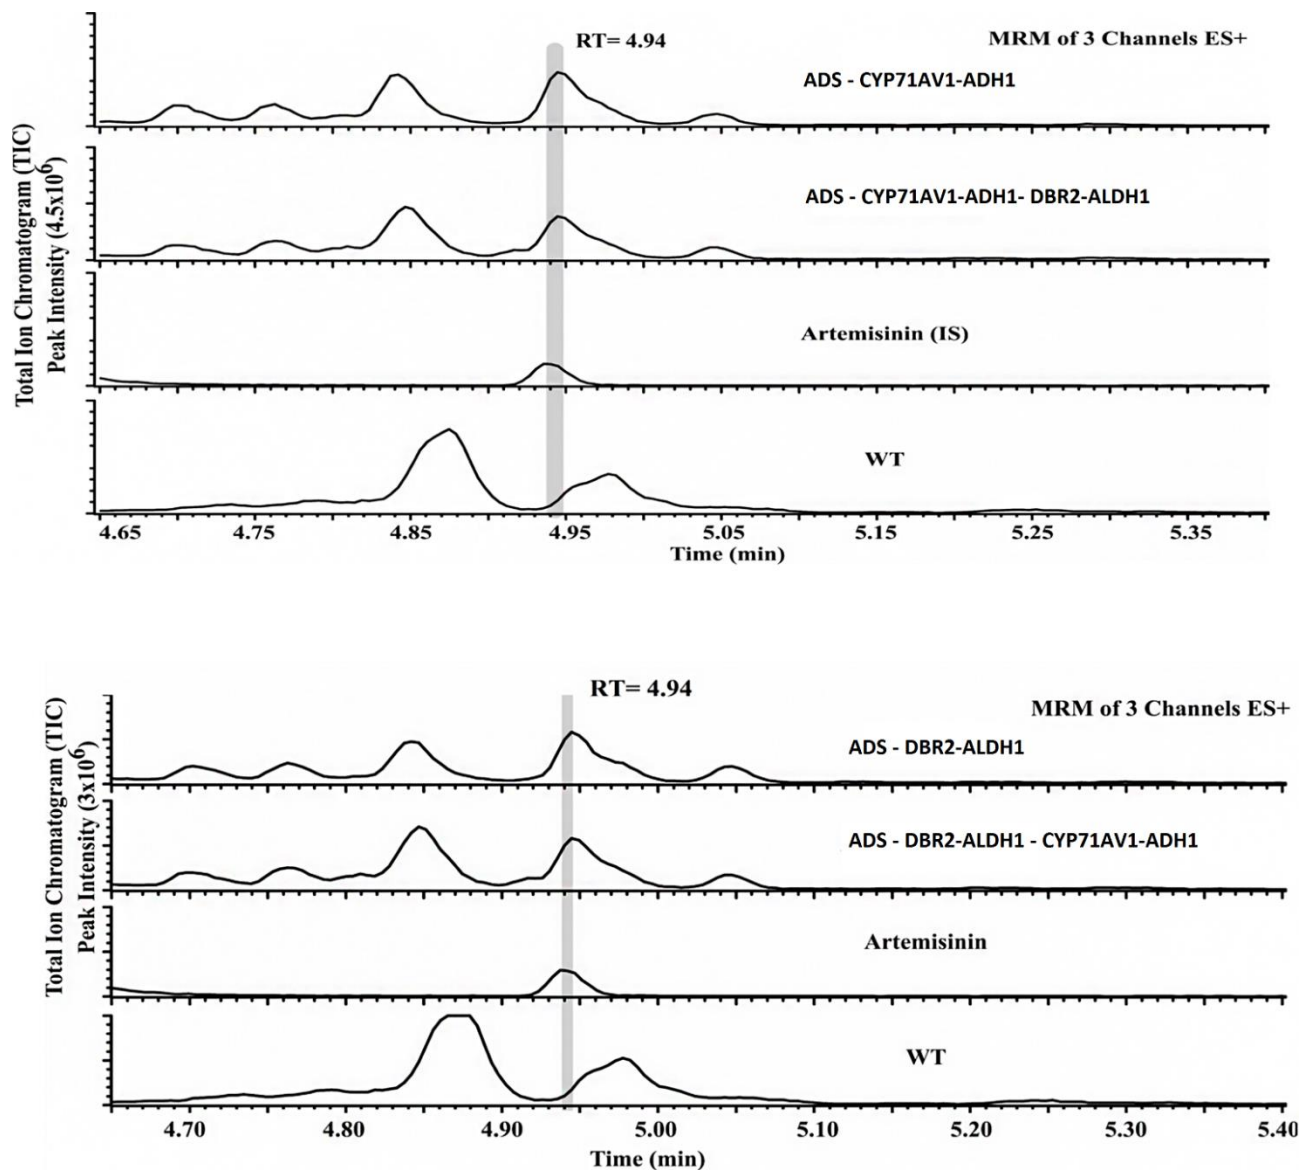

**Supplemental Figure S2.** UPLC-MRM-MS analysis of artemisinin from various constructs introduced in *P. patens* (*ADS-CYP71AV1-ADH1*; *ADS-DBR21-ALDH*; *ADS-CYP71AV1-ADH1-DBR2-ALDH1*; *ADS-DBR21-ALDH-CYP71AV1-ADH1*), an internal standard (IS) and WT as control with retention time (RT). TIC represents the sum of MRM channels used for the detection of artemisinin:  $m/z$  283.19>219.21; 283.19>247.19 and 283.19>265.22. For the full identification of artemisinin production *P. patens* please see previously published results [23].

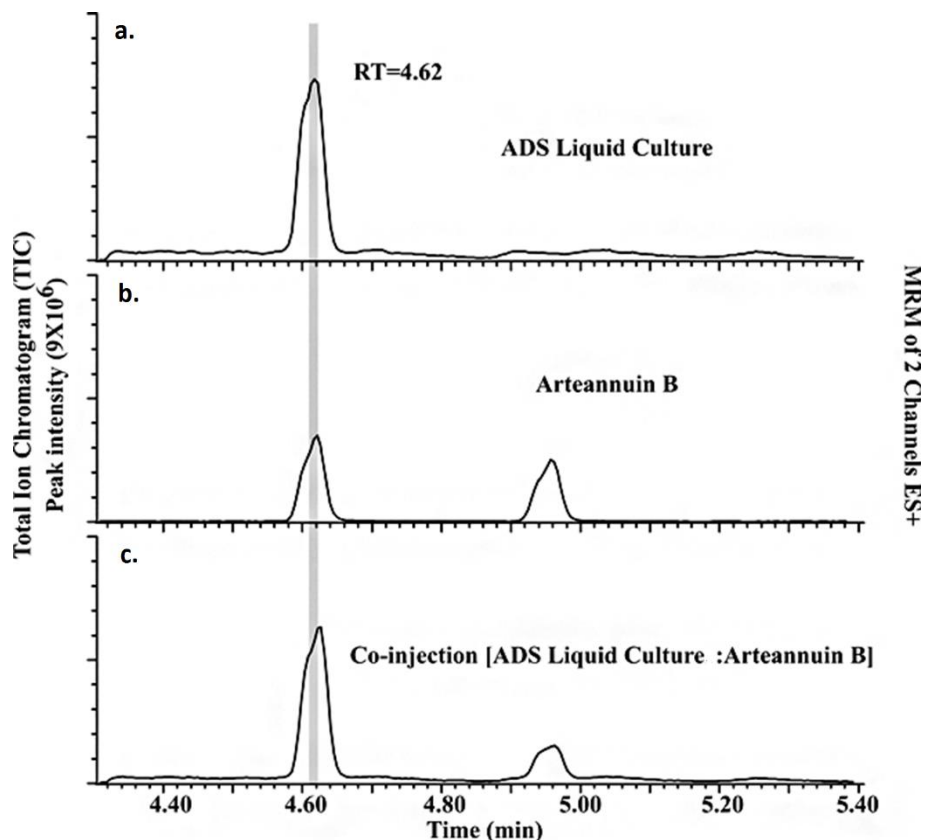

**Supplemental Figure S3.** UPLC-MRM-MS analysis of arteannuin B produced in (a) liquid culture of *ADS*-transgenic *P. patens*, (b) an internal standard (arteannuin B), and (c) co-injection of *ADS*-transgenic *P. patens* and internal standard (arteannuin B) as control with 4.62 retention time (RT). TIC represents the sum of MRM channels used for the detection of arteannuin B. The signal at 4.9-5 is not artemisinin, and was not identified which is also discussed in previously published work [23].

## Supplemental Table S1. Primers used

|    | Primer Sequence                                              | Comment                                    |
|----|--------------------------------------------------------------|--------------------------------------------|
| 1  | TCAGAATTAGATTGACATATATGTTGAAAATGGATCAAAG                     | Forward primer for HR 5' flanking region   |
| 2  | ATTCCATTCTTGGTCAGATGAGTTTACTCTTTC                            | Reverse primer for HR 5' flanking region   |
| 3  | TAATTCTTTCTTTTGGAGGTATATATTATCTTAGCATGG                      | Forward primer for HR 3' flanking region   |
| 4  | ACGAAGGCCGTTCTTCCCTGG                                        | Reverse primer for HR 3' flanking region   |
| 5  | CCCTGTGTTTGGTGTTACTTCTGCAGGTCGAAGCTAAATGGGCTAACGAAGGC        | Forward primer for ADS                     |
| 6  | GGCGTCTCGCATATCTCATTAAAGCAGGACTCAGATGGACATCGGGTAAACCAG       | Reverse primer for ADS                     |
| 7  | TAATGAGCATTGCATGTCTAAGTTATAAAAAATTACCAC                      | Forward primer for ZmUBI promoter          |
| 8  | AAATAATTATAAACATACTTGTATTATAATAGATAGGTAAGGTTAGAGC            | Reverse primer for ZmUBI promoter          |
| 9  | GTCTCGCATATCTCATTAAAGCAGGAC                                  | Forward primer for OCS terminator          |
| 10 | GTTACCCGGCCGCCGTCCTCAAAAAGAAAGAATTA                          | Reverse primer for OCS terminator          |
| 11 | CTACTCCAAAAATGTCAAAGATACAGTCTCAGAAG                          | Forward primer for G418 selection cassette |
| 12 | ACTGGATTTTGGTTTTAGGAATTAGAAATTTTATTGATAGAAG                  | Reverse primer for G418 selection cassette |
| 13 | GGCCCGAGGTCATTCATATGC                                        | Forward primer for rice actin promoter     |
| 14 | GTGCCATTGCTTTGAGGATAGATTTTCATTCTAGAGGATCCCCGATATCTTCTACC     | Reverse primer for rice actin promoter     |
| 15 | ATGAAATCTATCCTCAAAGCAATGGCAC                                 | Forward primer for CYP71ADH1-LP4/2A-ADH1   |
|    |                                                              | Reverse primer for CYP71ADH1-LP4/2A-ADH1   |
| 16 | AGTAGCAACTTCGCTGCTGCATTTGATCAAAACTTAATAAGGATTTTCACGCAGTCAGG  | Forward primer for NOS terminator          |
| 17 | AGCGGCCGATCGTTCAAAC                                          | Reverse primer for NOS terminator          |
| 18 | GAGACTGTATCTTTGACATTTTTGGAGTATTAGCATTCTTTCTGAAAGGGAATTCTCATG | Forward primer for Hyg selection cassette  |
| 19 | TACTCCAAAAATGTCAAAGATACAGTCTCAGAAG                           | Reverse primer for Hyg selection cassette  |
| 20 | AGTTTTGATCTTGAAAGATCTTTTATCTTTAGAGTTAAGAACTCTT               | Forward primer for AtiUBI promoter         |
| 21 | ACAACCAAGCGGCTTGAAACAATAG                                    | Reverse primer for AtiUBI promoter         |
| 22 | GGAGAACAGAGTAGGTTTTTCGGACATCTTTGTGTTTCGTCTCTCTCACGTAGAAAC    | Forward primer for DBR2-LP4/2A-ALDH1       |
| 23 | ATGTCCGAAAAACCTACTCTGTTCTCC                                  | Reverse primer for DBR2-LP4/2A-ALDH1       |
| 24 | AGCAAGCAAGAGATGGGATTCTTGATAAGAGTCTCTTCACAGCCACGGACTGTCATAG   | Forward primer for Arabidopsis terminator  |
| 25 | AGAGACTCTTATCAAGAATCCCATCTCTTGC                              | Reverse primer for Arabidopsis terminator  |
| 26 | ACTGTATCTTTGACATTTTTGGAGTAGAGTTGGTACGTCACAAACTTAAATCATTTTAC  | Forward primer for qPCR-ADS                |
| 27 | ATCCGCCGATCGCTAACTTC                                         | Reverse primer for qPCR-ADS                |
| 28 | CTGGATCTCGTCGATCAGCTTCAAC                                    | Forward primer for qPCR-CYP71AV1           |
| 29 | CTCTTACAGGCGAGATTGTGCTCTATC                                  | Reverse primer for qPCR-CYP71AV1           |
| 30 | TCTTGACAGGTTCCAACACTC                                        | Forward primer for qPCR-ADH1               |
| 31 | GGAAGCATCAAAGATCGGCATTGG                                     | Reverse primer for qPCR-ADH1               |
| 32 | GAGAAGTTCATCAAGCTGGATCTCCTTG                                 | Forward primer for qPCR-DBR2               |
| 33 | CGGTTGGCTTACCTGCACG                                          | Reverse primer for qPCR-DBR2               |
| 34 | AAGTCGGCATCCCCTTGTGC                                         | Forward primer for qPCR-ALDH1              |
| 35 | ATGTCAAGCGGGGCTAACGG                                         | Reverse primer for qPCR-ALDH1              |
| 36 | CTTGCAGCTTCACTGCGAGG                                         |                                            |

**Supplemental Table S2.** Optimized MRM transition settings for UPLC-MRM-MS measurement of artemisinin, artemisinic acid, dihydroartemisinic acid, artemisinic alcohol and dihydroartemisinic alcohol.

|                            | Parent<br>( <i>m/z</i> ) | Daughter<br>( <i>m/z</i> ) | Cone voltage | Collision voltage |
|----------------------------|--------------------------|----------------------------|--------------|-------------------|
| Artemisinin                |                          | 265.22                     | 12           | 14                |
|                            | 283.19                   | 247.19                     | 12           | 8                 |
|                            |                          | 219.21                     | 12           | 8                 |
| Artemisinic acid           |                          | 217.21                     | 18           | 14                |
|                            | 235.16                   | 199.25                     | 18           | 16                |
|                            |                          | 189.22                     | 18           | 10                |
| Dihydroartemisinic acid    |                          | 163.17                     | 16           | 28                |
|                            | 237.16                   | 107.12                     | 16           | 26                |
|                            |                          | 81.10                      | 16           | 18                |
| Artemisinic alcohol        |                          | 203.27                     | 14           | 20                |
|                            | 221.16                   | 147.09                     | 14           | 10                |
| Dihydroartemisinic alcohol |                          | 205.27                     | 14           | 24                |
|                            | 223.22                   | 109.13                     | 14           | 14                |
|                            |                          | 95.07                      | 14           | 12                |

**Supplementary Table S3.** Retention time of measured metabolites by UPLC-MRM-MS, positive ionization mode.

| <i>Compound</i>            | <i>Retention time (minute)</i> |
|----------------------------|--------------------------------|
| Artemisinin                | 4.90                           |
| Arteannuin B               | 4.62                           |
| Dihydroartemisinic alcohol | 6.31                           |
| Artemisinic alcohol        | 6.17                           |
| Dihydroartemisinic acid    | 5.92                           |
| Artemisinic acid           | 6.03                           |
